# Supplementary material
Source: Springer Nature journal article supplement (https://www.springermedizin.de/resource/supplementary/12936_2011_1698_MOESM2_ESM.pdf/9542384)
Supplement: MOESM2 [file 9542384]

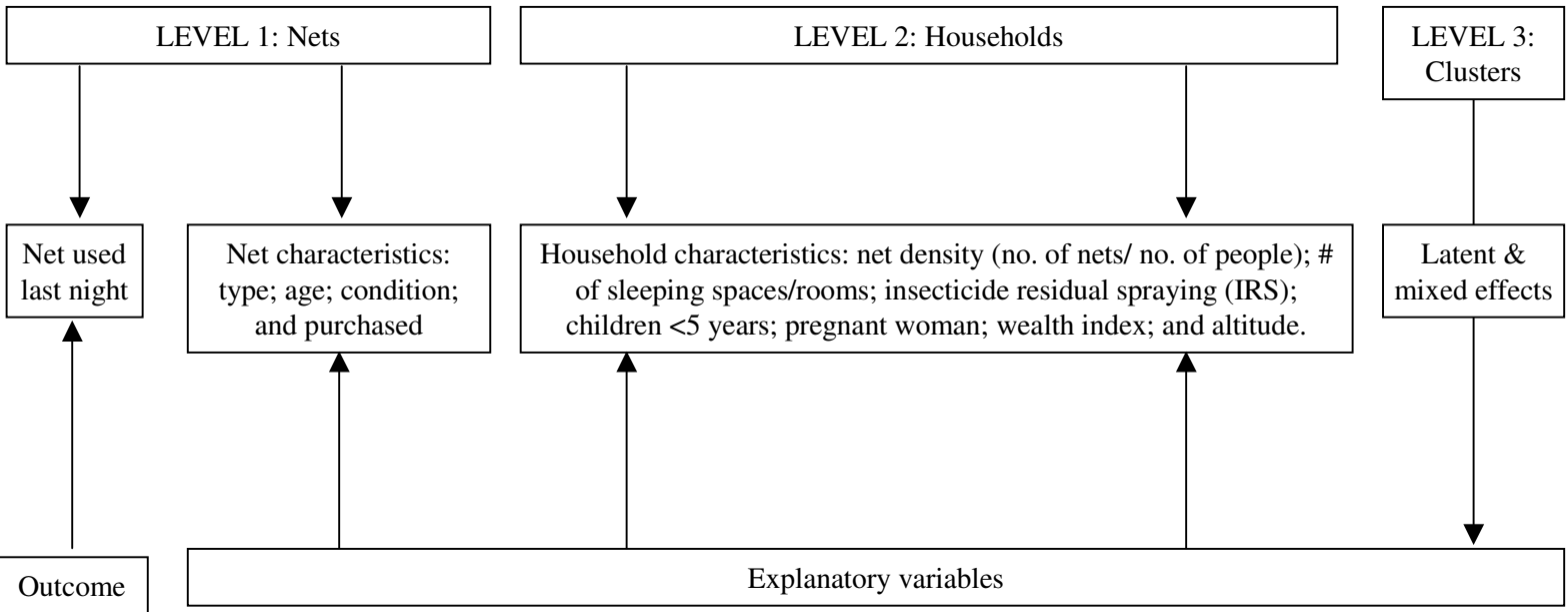

LEVEL 1: Nets

LEVEL 2: Households

LEVEL 3:  
Clusters

Net used  
last night

Net characteristics:  
type; age; condition;  
and purchased

Household characteristics: net density (no. of nets/ no. of people); #  
of sleeping spaces/rooms; insecticide residual spraying (IRS);  
children <5 years; pregnant woman; wealth index; and altitude.

Latent &  
mixed effects

Outcome

Explanatory variables
